# Supplementary material for: Polymorphism of The Regulatory Region of the ITGAM Gene (-323G>A) as a Novel Predictor of a Poor Nutritional Status in Head and Neck Cancer Patients Subjected to Intensity-Modulated Radiation Therapy
Source: PubMed Central journal article supplement (PMC7765043; doi:10.3390/jcm9124041), 2020-12-14
Supplement: jcm-09-04041-s001.pdf [file jcm-09-04041-s001.pdf]

**Table S1.** Distribution of demographic, clinical and nutritional variable according to *ITGAM* genotypes.

| Variable                                                       | <i>ITGAM</i> genotype median<br>(interquartile range) |                     |          |                     |                     | <i>p</i> |
|----------------------------------------------------------------|-------------------------------------------------------|---------------------|----------|---------------------|---------------------|----------|
|                                                                | AA                                                    | GA or GG            | <i>p</i> | GG                  | GA or AA            |          |
| Age [years]                                                    | 64.0<br>(56.0–76.0)                                   | 61.5<br>(57.0–66.5) | 0.3814   | 65.0<br>(59.0–69.0) | 62.0<br>(56.0–70.0) | 0.7656   |
| Weight [kg]                                                    | 64.0<br>(53.0–74.0)                                   | 66.0<br>(55.0–73.0) | 0.7891   | 62.5<br>(54.0–80.0) | 66.0<br>(55.0–74.0) | 0.9321   |
| BMI [kg/m <sup>2</sup> ]                                       | 24.5<br>(19.7–25.7)                                   | 22.8<br>(19.8–24.6) | 0.3619   | 21.5<br>(20.3–22.8) | 22.9<br>(19.7–25.3) | 0.5229   |
| TP [g/L]                                                       | 6.6<br>(6.3–6.9)                                      | 6.7<br>(6.2–7.1)    | 0.6705   | 6.8<br>(6.2–7.1)    | 6.7<br>(6.3–7.0)    | 0.8148   |
| Albumin [g/L]                                                  | 3.4<br>(3.3–3.7)                                      | 3.3<br>(3.1–3.5)    | 0.0241 * | 3.1<br>(3.1–3.2)    | 3.3<br>(3.2–3.5)    | 0.0268 * |
| Prealbumin [g/dL]                                              | 0.2<br>(0.2–0.2)                                      | 0.2<br>(0.2–0.3)    | 0.5473   | 0.2<br>(0.2–0.3)    | 0.2<br>(0.2–0.3)    | 0.8899   |
| Transferrin [g/L]                                              | 2.2<br>(1.8–2.7)                                      | 2.5<br>(2.1–3.1)    | 0.2432   | 2.7<br>(2.1–3.1)    | 2.5<br>(1.9–3.0)    | 0.4370   |
| FM [kg]                                                        | 20.0<br>(16.2–24.9)                                   | 16.5<br>(11.9–23.6) | 0.1140   | 26.2<br>(22.3–30.7) | 18.4<br>(13.6–23.6) | 0.1567   |
| FM%                                                            | 28.4<br>(24.5–36.1)                                   | 24.8<br>(19.2–34.3) | 0.1008   | 32.1<br>(29.4–37.4) | 26.3<br>(22.6–34.6) | 0.2289   |
| FFM [kg]                                                       | 45.5<br>(42.7–48.7)                                   | 48.6<br>(45.0–53.3) | 0.0780   | 51.8<br>(46.0–53.7) | 46.0<br>(44.4–53.1) | 0.1832   |
| FFM%                                                           | 71.6<br>(64.1–75.7)                                   | 75.2<br>(65.9–82.3) | 0.1168   | 67.9<br>(62.6–70.7) | 73.9<br>(65.3–77.6) | 0.1903   |
| Fat-Free Mass Index<br>(FFMI)[kg/m <sup>2</sup> ]              | 16.5<br>(14.5–17.0)                                   | 16.7<br>(16.0–18.5) | 0.0983   | 17.7<br>(16.7–21.0) | 16.5<br>(14.8–18.3) | 0.0905   |
| Normalized Fat-Free Mass Index<br>(nFFMI) [kg/m <sup>2</sup> ] | 16.7<br>(15.0–18.2)                                   | 17.3<br>(16.4–18.9) | 0.1113   | 18.6<br>(17.1–22.2) | 17.2<br>(15.1–18.3) | 0.0989   |

\* - statistically significant results.

**Table S2.** Distribution of demographic, clinical and nutritional variables according to SGA.

| Variable                                                    | SGA median<br>(interquartile range) |                     |           |                     |                      | <i>p</i> |
|-------------------------------------------------------------|-------------------------------------|---------------------|-----------|---------------------|----------------------|----------|
|                                                             | A                                   | B or C              | <i>p</i>  | A or B              | C                    |          |
| Age [years]                                                 | 66.0<br>(54.0–76.0)                 | 61.0<br>(57.0–67.0) | 0.4364    | 63.0<br>(56.0–68.0) | 63.5<br>(58.0–71.0)  | 0.7770   |
| Weight [kg]                                                 | 76.0<br>(69.0–83.0)                 | 62.0<br>(54.0–68.0) | 0.002 *   | 68.0<br>(54.0–76.0) | 62.5<br>(55.0–68.0)  | 0.2970   |
| BMI [kg/m <sup>2</sup> ]                                    | 25.0<br>(24.5–30.1)                 | 21.5<br>(19.2–24.4) | 0.0001 *  | 24.4<br>(19.8–25.7) | 21.2<br>(19.0–22.8)  | 0.0234 * |
| TP [g/L]                                                    | 6.8<br>(6.6–7.1)                    | 6.7<br>(6.2–7.0)    | 0.1692    | 6.7<br>(6.3–7.0)    | 6.7<br>(6.2–7.1)     | 0.6156   |
| Albumin [g/L]                                               | 3.8<br>(3.4–3.9)                    | 3.3<br>(3.2–3.4)    | <0.0001 * | 3.4<br>(3.3–3.6)    | 3.2<br>(3.1–3.4)     | 0.0011 * |
| Prealbumin [g/dL]                                           | 0.2<br>(0.2–0.2)                    | 0.2<br>(0.2–0.3)    | 0.6209    | 0.2<br>(0.2–0.3)    | 0.2<br>(0.2–0.3)     | 0.9180   |
| Transferrin [g/L]                                           | 2.5<br>(1.8–3.1)                    | 2.5<br>(2.0–3.0)    | 0.7655    | 2.2<br>(1.9–3.0)    | 2.7<br>(2.1–3.1)     | 0.4398   |
| FM [kg]                                                     | 17.2<br>(12.4–24.9)                 | 20.0<br>(16.4–23.3) | 0.1831    | 18.7<br>(13.9–24.9) | 17.6<br>(11.2–23.5)  | 0.5323   |
| FM%                                                         | 27.5<br>(22.0–36.1)                 | 26.7<br>(24.5–33.8) | 0.7655    | 26.7<br>(23.7–34.7) | 26.8<br>(18.1–34.6)  | 0.5323   |
| FFM [kg]                                                    | 47.7<br>(44.5–53.2)                 | 45.5<br>(41.1–54.2) | 0.5364    | 45.9<br>(44.4–53.2) | 49.1<br>(44.5–53.5)  | 0.5408   |
| FFM%                                                        | 73.9<br>(66.0–75.7)                 | 72.6<br>(64.1–80.4) | 0.6837    | 73.5<br>(65.3–76.5) | 73.0<br>(65.1–82.13) | 0.6155   |
| Fat-Free Mass Index (FFMI)[kg/m <sup>2</sup> ]              | 16.7<br>(15.7–18.5)                 | 16.4<br>(14.3–16.7) | 0.0596    | 16.5<br>(14.6–18.3) | 16.7<br>(15.4–18.3)  | 0.5588   |
| Normalized Fat-Free Mass Index (nFFMI) [kg/m <sup>2</sup> ] | 17.4<br>(15.9–19.0)                 | 16.4<br>(14.8–17.4) | 0.0275 *  | 17.2<br>(15.1–18.6) | 17.2<br>(15.8–18.6)  | 0.5408   |

\* - statistically significant results.

**Table S3.** Distribution of demographic, clinical and nutritional variables according to NRS and CWL.

| Variable                                                           | NRS median<br>(interquartile range) |                     | <i>p</i> | CWL median<br>(interquartile range) |                     | <i>p</i> |
|--------------------------------------------------------------------|-------------------------------------|---------------------|----------|-------------------------------------|---------------------|----------|
|                                                                    | <3                                  | ≥3                  |          | No                                  | Yes                 |          |
| <b>Age</b> [years]                                                 | 61.0<br>(56.0–70.0)                 | 63.5<br>(58.0–66.0) | 0.7329   | 64.0<br>(57.0–67.0)                 | 61.0<br>(56.0–70.0) | 0.8368   |
| <b>Weight</b> [kg]                                                 | 68.0<br>(57.0–76.0)                 | 59.5<br>(51.0–67.0) | 0.0208 * | 69.0<br>(64.0–76.0)                 | 61.5<br>(54.0–69.0) | 0.0400 * |
| <b>BMI</b> [kg/m <sup>2</sup> ]                                    | 23.1<br>(20.3–25.7)                 | 19.7<br>(18.3–23.5) | 0.0026 * | 22.9<br>(21.9–25.0)                 | 22.7<br>(19.6–25.2) | 0.3687   |
| <b>TP</b> [g/L]                                                    | 6.7<br>(6.3–7.0)                    | 6.7<br>(6.2–7.1)    | 0.9026   | 6.7<br>(6.3–7.1)                    | 6.6<br>(6.2–6.9)    | 0.2612   |
| <b>Albumin</b> [g/L]                                               | 3.3<br>(3.2–3.5)                    | 3.4<br>(3.3–3.6)    | 0.2387   | 3.3<br>(3.2–3.5)                    | 3.3<br>(3.2–3.5)    | 0.7836   |
| <b>Prealbumin</b> [g/dL]                                           | 0.2<br>(0.2–0.3)                    | 0.2<br>(0.2–0.3)    | 0.4322   | 0.2<br>(0.2–0.2)                    | 0.2<br>(0.2–0.3)    | 0.7267   |
| <b>Transferrin</b> [g/L]                                           | 2.5<br>(2.0–3.1)                    | 2.2<br>(1.8–2.7)    | 0.1605   | 2.2<br>(2.0–2.7)                    | 2.6<br>(2.0–3.1)    | 0.3589   |
| <b>FM</b> [kg]                                                     | 20.0<br>(14.2–30.0)                 | 16.3<br>(11.9–23.3) | 0.0833   | 19.3<br>(14.4–25.1)                 | 17.2<br>(11.5–23.6) | 0.2747   |
| <b>FM%</b>                                                         | 26.9<br>(23.7–34.7)                 | 26.5<br>(22.0–34.6) | 0.7524   | 25.2<br>(23.7–33.4)                 | 26.8<br>(22.0–35.4) | 0.9751   |
| <b>FFM</b> [kg]                                                    | 47.9<br>(45.0–53.5)                 | 45.5<br>(42.9–51.3) | 0.1869   | 53.1<br>(45.5–54.2)                 | 45.6<br>(44.5–50.3) | 0.0123 * |
| <b>FFM%</b>                                                        | 73.2<br>(65.3–76.5)                 | 73.9<br>(65.2–82.5) | 0.4990   | 74.8<br>(66.6–76.5)                 | 73.4<br>(64.6–81.5) | 0.8760   |
| <b>Fat-Free Mass Index (FFMI)</b> [kg/m <sup>2</sup> ]             | 16.7<br>(16.0–18.5)                 | 16.1<br>(14.5–16.8) | 0.0353 * | 17.3<br>(16.1–18.6)                 | 16.5<br>(14.7–16.8) | 0.0206 * |
| <b>Normalized Fat-Free Mass Index (nFFMI)</b> [kg/m <sup>2</sup> ] | 17.4<br>(16.4–18.8)                 | 16.5<br>(14.7–17.8) | 0.0291 * | 18.5<br>(16.4–19.7)                 | 17.1<br>(15.1–17.6) | 0.0425 * |

\* - statistically significant results.
